# Supplementary material
Source: PubMed Central journal article supplement (PMC7965810)
Supplement: 3730_table.pdf [file 3730_table.pdf]

**On-line Table 1: Survey questions posed**

- 1) Have you ever been named in a malpractice suit?  
 Yes  
 No
- 2) How many suits have you been named in?  
 1  
 2  
 3  
 More than 3
- 3) For each suit (of most recent 3), what was the outcome?  
 It was dropped  
 The case was settled with a payout to the plaintiff  
 The case was settled without a payout to the plaintiff  
 The case went to trial with a plaintiff verdict  
 The case went to trial with a defendant verdict  
 Other (please specify)
- 4) If there was a verdict or a settlement with the plaintiff, how much was paid out?
- |                          | For the most costly suit you were involved in | For the average of the suits you were involved in |
|--------------------------|-----------------------------------------------|---------------------------------------------------|
| <\$50,000                | <input type="checkbox"/>                      | <input type="checkbox"/>                          |
| \$50,000 to \$150,000    | <input type="checkbox"/>                      | <input type="checkbox"/>                          |
| \$150,001 to \$300,000   | <input type="checkbox"/>                      | <input type="checkbox"/>                          |
| \$300,001 to \$600,000   | <input type="checkbox"/>                      | <input type="checkbox"/>                          |
| \$600,001 to \$1,200,000 | <input type="checkbox"/>                      | <input type="checkbox"/>                          |
| >\$1,200,000             | <input type="checkbox"/>                      | <input type="checkbox"/>                          |
- 5) For the suits you were named in, what was the nature of the alleged negligence (you may choose more than one)?  
 a) Non-detection of a lesion (did not see it)  
 b) Misinterpretation of a finding (saw abnormality but called it the wrong thing)  
 c) Lack of communication of a finding  
 d) Technical error with machinery  
 e) Complication during performance of a procedure  
 f) Issue unrelated to a patient's study (fall, trip, HIPAA violation)  
 g) Informed consent issue  
 h) Other (please specify)
- 6) Please rate your current fear of being sued.  
 Extremely low: Never think about it  
 Very low: Rarely crosses my mind  
 Relatively low: Not very concerned  
 Mild  
 Moderately high: occasionally concerned  
 Very high: frequently concerned  
 Extremely high: always concerned
- 7) What is your main concern about being sued?  
 My reputation among peers  
 The cost of my malpractice insurance  
 My personal assets at risk  
 The impact on the patient who is "injured"  
 I will lose my confidence and practice defensive medicine  
 The impact on the overall health care system  
 Being named in the national practitioners data bank  
 Unfavorable publicity in the media  
 My ego  
 Other (please specify):
- 8) What is your assessment of the malpractice legal process in the United States?  
 Heavily weighted to plaintiff  
 Somewhat weighted to the plaintiff  
 Fair  
 Somewhat weighted to the defendant  
 Heavily weighted to the defendant

- 9) True or false? In the last 2 months, there was a case I read incorrectly (that I know about) that could lead to a medical malpractice case.  
 True  
 False
- 10) Comments:
- 11) Are you  
 Male  
 Female
12. What is your age?  
 <30 years  
 31–40 years  
 41–50 years  
 51–60 years  
 61–70 years  
 >70 years
- 13) Your practice is best described as:  
 In training  
 Practicing predominantly diagnostic neuroradiology  
 Practicing predominantly interventional neuroradiology  
 Predominantly non-clinical  
 Other (please specify)
